# Supplementary material for: The host genomic environment of the provirus determines the abundance of HTLV-1–infected T-cell clones
Source: PubMed Central journal article supplement — Blood. 2011 Jan 12;117(11):3113–22. doi: 10.1182/blood-2010-10-312926 (PMC3062313; doi:10.1182/blood-2010-10-312926), 2011-03-17
Supplement: supp_blood-2010-10-312926_Document1.pdf [file supp_blood-2010-10-312926_Document1.pdf]

### A. Analysis pipeline

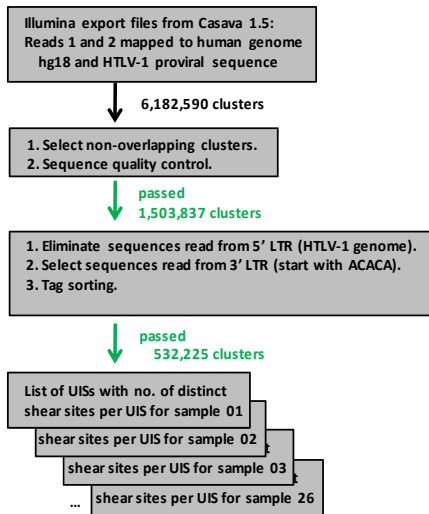

### B. Calibration curve

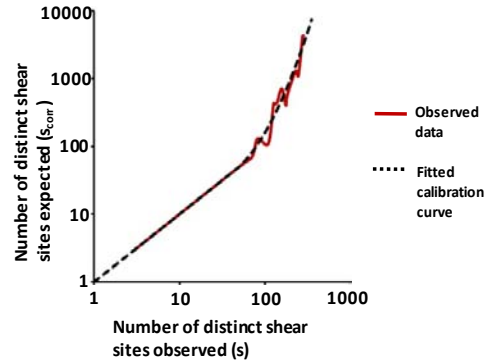

## Figure S1

(A) A cluster is the result of amplification of a single molecule during the solid phase PCR of a library on the Illumina flow cell. The numbers of clusters given here are from a representative experiment. (B) To generate the calibration curve, three dilutions of genomic DNA from an HTLV-1 infected individual (10 $\mu$ g, 1 $\mu$ g and 0,1 $\mu$ g) were analyzed, each in duplicate.

**A. Oligoclonality index calculation**

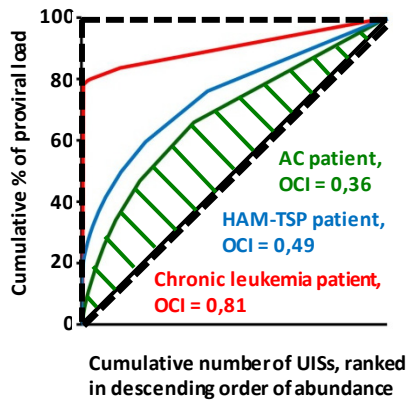

**B. Oligoclonality index vs. estimated total number of UISS**

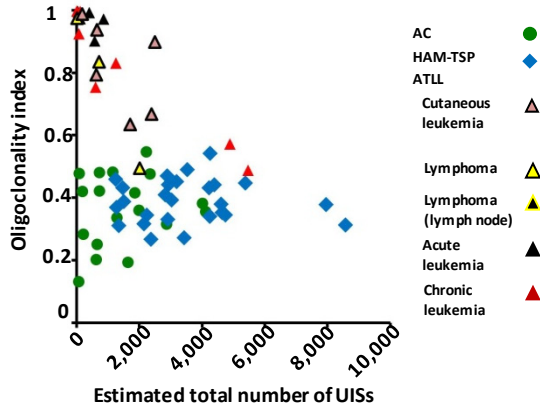

**C. Shannon evenness index**

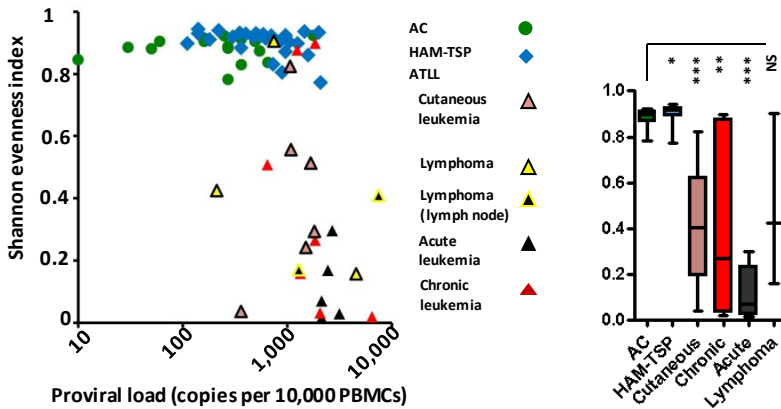

**Figure S2**

(A) For each individual, the curve shows the rise in the cumulative percentage of the proviral load as insertion sites are added in descending order of abundance. The oligoclonality index is defined by the area between these curves and the diagonal line (e.g. hatched area for AC) as a fraction of the triangle indicated by the dotted black line. The larger the area, the less uniform the distribution of insertion site abundance. A patient with a perfect monoclonal distribution (only one clone) will have an oligoclonality index of 1. A patient with a perfect polyclonal distribution (each clone has equal abundance) will have an oligoclonality index of 0. (B) The oligoclonality index did not correlate with the estimated total number of UISS, either in ACs or in patients with HAM-TSP. (C) Shannon evenness index distinguished patients with ATLL from subjects with non-malignant HTLV-1 infection (Mann-Whitney,  $p < 0.0001$ ). Mean CV of Shannon evenness = 1,5% (triplicate analysis of 11 samples).

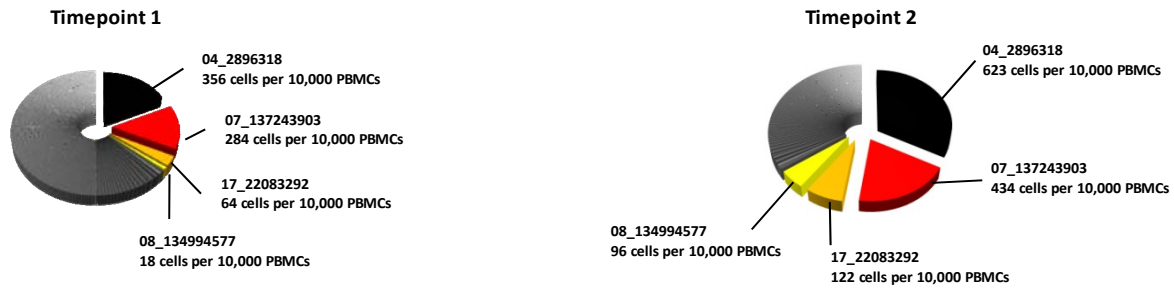

**Figure S3. HTLV-1 clonality in the blood of patient TBK at timepoints 1 and 2. UIS position and abundance are given for the 4 largest clones**

The coordinate 04\_2896318 denotes insertion of the provirus in chromosome 4, nucleotide position 2896318. The data show that the increase in the oligoclonality index in this patient was due to the expansion of clones that were already abundant at timepoint 1.

**A. Environment of the major UIS of an asymptomatic carrier: HDA**

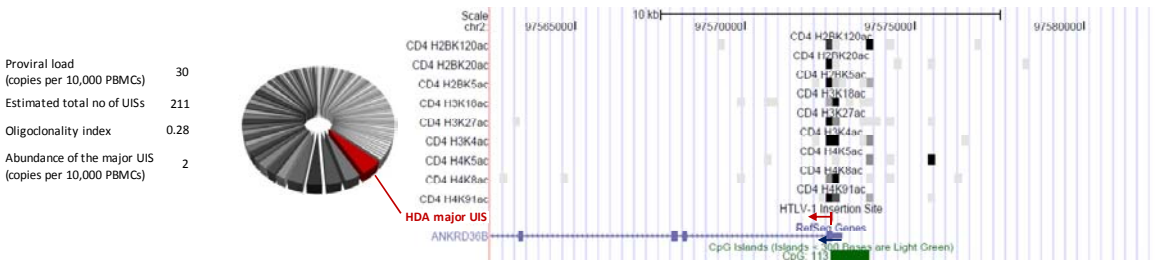

**B. Environment of the major UIS of a patient with HAM-TSP: TBK**

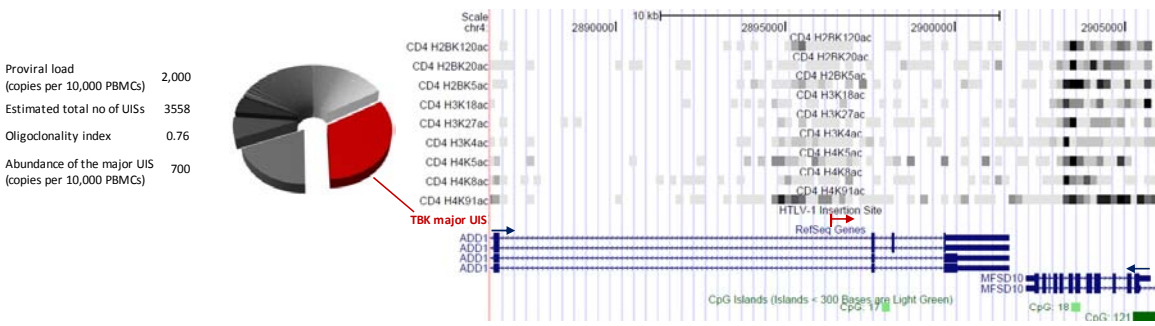

**C. Environment of the major UIS of a patient with chronic leukemia: HCGLEY**

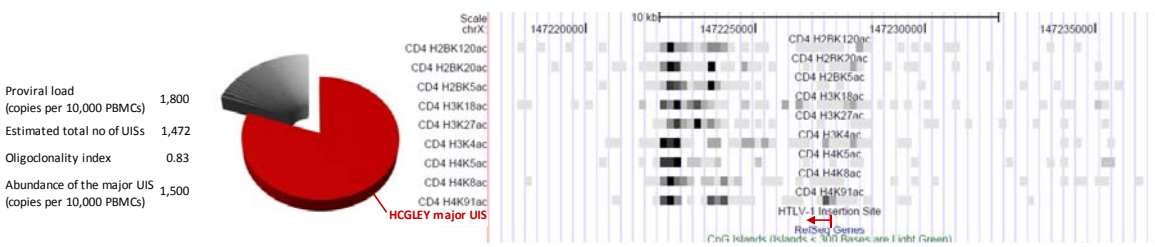

**Figure S4. Genetic and epigenetic environment of the major UIS in 3 infected individuals**

The clonal structure of the UIS population in each individual is illustrated by the pie charts. The red slice represents the major UIS. UCSC Genome Browser tracks were used to illustrate the environment within +/- 10kb of the insertion site (vertical red line with horizontal red arrow showing the provirus and its orientation). Different histone acetylation marks are represented together with a track for RefSeq genes (blue lines; the blue arrow gives the orientation of the gene) and for CpG islands (green boxes).

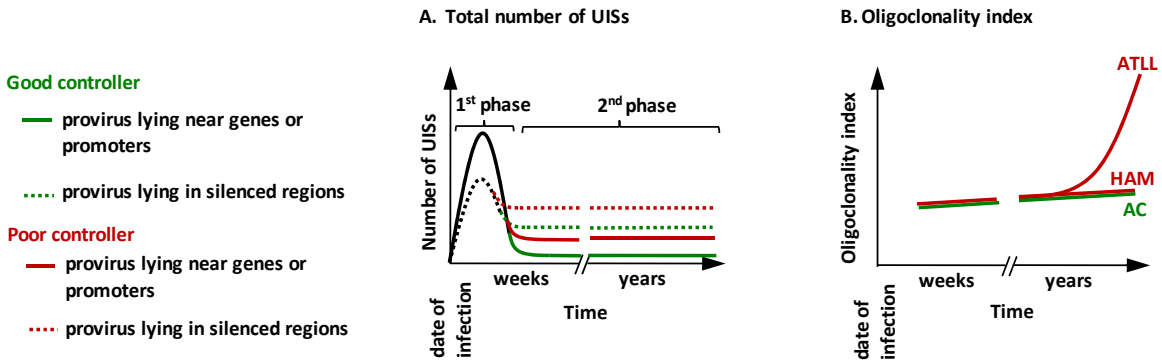

**Figure S5. Progression of HTLV-1 replication and oligoclonality in hosts who differ in the efficiency of the anti-HTLV-1 immune response: a hypothetical scheme**

(A) In the first phase of infection, before the immune response, the virus disseminates in the host by cell-to-cell transmission, generating a large number of distinct UISs. Proviruses integrated near host genes and promoters (solid black line) outnumber proviruses integrated in transcriptionally silent DNA (dotted black line). In the second phase, the host immune response negatively selects T-cells that express viral proteins, resulting in an inversion of the ratio of proviruses inserted in active transcribed genomic regions (solid lines) to proviruses integrated in silenced DNA (dotted lines). A good HTLV-1 controller (green curves), i.e. an individual able to mount an efficient anti-HTLV-1 immune response, limits the total number of UISs more effectively than a poor controller (red curves). In the chronic phase of infection, the less efficient immune (CTL) response in a poor controller allows provirus-expressing T-cells to proliferate faster than in the good controller. (B) The oligoclonality index increases continuously during the chronic phase; in a minority of individuals, one or more infected T-cell clones undergoes malignant transformation, resulting in a sharp rise in the oligoclonality index and culminating in ATLL.

| Flow cell no. | Patient code | Disease status | Sample type | Age (years) | PVL (copy number per 10,000 PBMCs) | CD4 count     | percentage of CD4 in lymphocytes | Number of reads (human sequences only) | Number of UISS observed | Estimated total number of UISS in host | OCI  |
|---------------|--------------|----------------|-------------|-------------|------------------------------------|---------------|----------------------------------|----------------------------------------|-------------------------|----------------------------------------|------|
| 0             | TBP          | HAM/TSP        | PBMCs       | 69          | 350                                | 760           | 44%                              | 36279                                  | 3613                    | 8569                                   | 0.31 |
| 0             | TBU          | HAM/TSP        | PBMCs       | 65          | 110                                | 1000          | 38%                              | 70258                                  | 749                     | 1245                                   | 0.46 |
| 0             | TCQ          | HAM/TSP        | PBMCs       | 68          | 500                                | not available | not available                    | 44629                                  | 2156                    | 4743                                   | 0.35 |
| 0             | HBX          | AC             | PBMCs       | 54          | 270                                | not available | not available                    | 42889                                  | 644                     | 1153                                   | 0.48 |
| 0             | HDG          | AC             | PBMCs       | 24          | 270                                | 1330          | 45%                              | 90212                                  | 1048                    | 2230                                   | 0.55 |
| 0             | HFG          | AC             | PBMCs       | 58          | 160                                | 1180          | 50%                              | 44436                                  | 413                     | 724                                    | 0.42 |
| 0             | HCD          | AC             | PBMCs       | 53          | 490                                | 470           | 50%                              | 5181                                   | 179                     | 633                                    | 0.20 |
| 0             | HFE          | AC             | PBMCs       | 66          | 390                                | 620           | 27%                              | 98809                                  | 802                     | 2199                                   | 0.92 |
| 1             | HAY          | AC             | PBMCs       | 59          | 400                                | not available | not available                    | 20957                                  | 993                     | 2258                                   | 0.47 |
| 1             | HT/UV1       | UV             | PBMCs       | 72          | 130                                | not available | not available                    | 17456                                  | 699                     | 1373                                   | 0.38 |
| 1             | TAA          | HAM/TSP        | PBMCs       | 64          | 350                                | not available | not available                    | 27947                                  | 1229                    | 2768                                   | 0.44 |
| 1             | TAL          | HAM/TSP        | PBMCs       | 63          | 930                                | not available | not available                    | 16061                                  | 1564                    | 3030                                   | 0.40 |
| 1             | TAW          | HAM/TSP        | PBMCs       | 73          | 160                                | not available | not available                    | 19120                                  | 571                     | 1184                                   | 0.38 |
| 1             | TAY          | HAM/TSP        | PBMCs       | 59          | 180                                | not available | not available                    | 23944                                  | 832                     | 1661                                   | 0.40 |
| 1             | TBC          | HAM/TSP        | PBMCs       | 59          | 2210                               | not available | not available                    | 20586                                  | 3684                    | 8163                                   | 0.39 |
| 1             | TBG          | HAM/TSP        | PBMCs       | 64          | 2300                               | not available | not available                    | 16767                                  | 2091                    | 3908                                   | 0.42 |
| 1             | TBK          | HAM/TSP        | PBMCs       | 75          | 1990                               | not available | not available                    | 25776                                  | 1159                    | 3485                                   | 0.46 |
| 1             | TBW          | HAM/TSP        | PBMCs       | 60          | 940                                | not available | not available                    | 37206                                  | 1600                    | 3323                                   | 0.48 |
| 1             | TW           | HAM/TSP        | PBMCs       | 34          | 430                                | not available | not available                    | 22054                                  | 1242                    | 2562                                   | 0.43 |
| 2             | HAY          | AC             | PBMCs       | 59          | 400                                | not available | not available                    | 19714                                  | 1048                    | 2443                                   | 0.48 |
| 2             | HT/UV1       | UV             | PBMCs       | 72          | 130                                | not available | not available                    | 11152                                  | 622                     | 1255                                   | 0.36 |
| 2             | TAA          | HAM/TSP        | PBMCs       | 64          | 350                                | not available | not available                    | 23493                                  | 1157                    | 2877                                   | 0.43 |
| 2             | TAL          | HAM/TSP        | PBMCs       | 63          | 930                                | not available | not available                    | 15628                                  | 1580                    | 2748                                   | 0.42 |
| 2             | TAW          | HAM/TSP        | PBMCs       | 73          | 160                                | not available | not available                    | 19644                                  | 649                     | 1363                                   | 0.37 |
| 2             | TAY          | HAM/TSP        | PBMCs       | 59          | 180                                | not available | not available                    | 16498                                  | 691                     | 1272                                   | 0.38 |
| 2             | TBC          | HAM/TSP        | PBMCs       | 59          | 2210                               | not available | not available                    | 14994                                  | 3261                    | 7414                                   | 0.37 |
| 2             | TBG          | HAM/TSP        | PBMCs       | 64          | 2300                               | not available | not available                    | 18897                                  | 2445                    | 4369                                   | 0.45 |
| 2             | TBK          | HAM/TSP        | PBMCs       | 75          | 1990                               | not available | not available                    | 61868                                  | 1951                    | 4772                                   | 0.57 |
| 2             | TBW          | HAM/TSP        | PBMCs       | 60          | 940                                | not available | not available                    | 28972                                  | 1652                    | 3734                                   | 0.48 |
| 2             | TW           | HAM/TSP        | PBMCs       | 34          | 430                                | not available | not available                    | 24793                                  | 1371                    | 3148                                   | 0.44 |
| 3             | HAY          | AC             | PBMCs       | 59          | 400                                | not available | not available                    | 21427                                  | 937                     | 2306                                   | 0.48 |
| 3             | HT/UV1       | UV             | PBMCs       | 72          | 130                                | not available | not available                    | 17149                                  | 559                     | 1181                                   | 0.34 |
| 3             | TAA          | HAM/TSP        | PBMCs       | 64          | 350                                | not available | not available                    | 34798                                  | 1393                    | 3136                                   | 0.46 |
| 3             | TAL          | HAM/TSP        | PBMCs       | 63          | 930                                | not available | not available                    | 17518                                  | 1579                    | 2692                                   | 0.40 |
| 3             | TAW          | HAM/TSP        | PBMCs       | 73          | 160                                | not available | not available                    | 23018                                  | 631                     | 1272                                   | 0.36 |
| 3             | TAY          | HAM/TSP        | PBMCs       | 59          | 180                                | not available | not available                    | 27499                                  | 802                     | 1584                                   | 0.39 |
| 3             | TBC          | HAM/TSP        | PBMCs       | 59          | 2210                               | not available | not available                    | 23558                                  | 3696                    | 8274                                   | 0.38 |
| 3             | TBG          | HAM/TSP        | PBMCs       | 64          | 2300                               | not available | not available                    | 29429                                  | 2919                    | 4892                                   | 0.45 |
| 3             | TBK          | HAM/TSP        | PBMCs       | 75          | 1990                               | not available | not available                    | 95290                                  | 1924                    | 4505                                   | 0.60 |
| 3             | TBW          | HAM/TSP        | PBMCs       | 60          | 940                                | not available | not available                    | 37981                                  | 1610                    | 3527                                   | 0.51 |
| 3             | TW           | HAM/TSP        | PBMCs       | 34          | 430                                | not available | not available                    | 41633                                  | 1727                    | 3852                                   | 0.48 |
| 4             | HAY          | AC             | PBMCs       | 67          | 360                                | 810           | 42%                              | 39593                                  | 1276                    | 2511                                   | 0.53 |
| 4             | HT/UV1       | UV             | PBMCs       | 81          | 150                                | 751           | 44%                              | 43623                                  | 591                     | 1189                                   | 0.44 |
| 4             | TAA          | HAM/TSP        | PBMCs       | 70          | 220                                | 620           | 33%                              | 21824                                  | 875                     | 2041                                   | 0.46 |
| 4             | TAL          | HAM/TSP        | PBMCs       | 71          | 870                                | 670           | 50%                              | 40315                                  | 1865                    | 3269                                   | 0.45 |
| 4             | TAW          | HAM/TSP        | PBMCs       | 81          | 140                                | 350           | 27%                              | 40045                                  | 566                     | 1181                                   | 0.45 |
| 4             | TAY          | HAM/TSP        | PBMCs       | 65          | 140                                | not available | not available                    | 26511                                  | 581                     | 996                                    | 0.36 |
| 4             | TBC          | HAM/TSP        | PBMCs       | 67          | 2000                               | 1220          | not available                    | 41063                                  | 4713                    | 9521                                   | 0.47 |
| 4             | TBG          | HAM/TSP        | PBMCs       | 73          | 1460                               | 1220          | 54%                              | 31079                                  | 2284                    | 4098                                   | 0.50 |
| 4             | TBK          | HAM/TSP        | PBMCs       | 82          | 2080                               | 1490          | 39%                              | 107509                                 | 1295                    | 3638                                   | 0.87 |
| 4             | TBW          | HAM/TSP        | PBMCs       | 65          | 730                                | 260           | 18%                              | 40735                                  | 1415                    | 3245                                   | 0.52 |
| 4             | TW           | HAM/TSP        | PBMCs       | 43          | 890                                | 1350          | 59%                              | 47244                                  | 2105                    | 3877                                   | 0.49 |
| 5             | HAY          | AC             | PBMCs       | 67          | 360                                | 810           | 42%                              | 23800                                  | 899                     | 2038                                   | 0.47 |
| 5             | HT/UV1       | UV             | PBMCs       | 81          | 150                                | 751           | 44%                              | 20111                                  | 523                     | 1015                                   | 0.44 |
| 5             | TAA          | HAM/TSP        | PBMCs       | 70          | 220                                | 620           | 33%                              | 18752                                  | 975                     | 2350                                   | 0.45 |
| 5             | TAL          | HAM/TSP        | PBMCs       | 71          | 870                                | 670           | 50%                              | 32749                                  | 1791                    | 2942                                   | 0.44 |
| 5             | TAW          | HAM/TSP        | PBMCs       | 81          | 140                                | 350           | 27%                              | 26460                                  | 547                     | 1051                                   | 0.41 |
| 5             | TAY          | HAM/TSP        | PBMCs       | 65          | 140                                | not available | not available                    | 17236                                  | 591                     | 1281                                   | 0.37 |
| 5             | TBC          | HAM/TSP        | PBMCs       | 67          | 2000                               | 1220          | not available                    | 22491                                  | 4002                    | 7909                                   | 0.44 |
| 5             | TBG          | HAM/TSP        | PBMCs       | 73          | 1460                               | 1220          | 54%                              | 18994                                  | 2007                    | 3813                                   | 0.48 |
| 5             | TBK          | HAM/TSP        | PBMCs       | 82          | 2080                               | 1490          | 39%                              | 63278                                  | 1173                    | 3333                                   | 0.74 |
| 5             | TBW          | HAM/TSP        | PBMCs       | 65          | 730                                | 260           | 18%                              | 41661                                  | 1942                    | 3928                                   | 0.55 |
| 5             | TW           | HAM/TSP        | PBMCs       | 43          | 890                                | 1350          | 59%                              | 29072                                  | 2157                    | 4146                                   | 0.52 |

| Flow cell no. | Patient code | Disease status              | Sample type | Age (years) | PVL (copy number per 10,000 PBMCs) | CD4 count      | percentage of CD4 in lymphocytes | Number of reads (human sequences only) | Number of UISS observed | Estimated total number of UISS in host | OCI  |
|---------------|--------------|-----------------------------|-------------|-------------|------------------------------------|----------------|----------------------------------|----------------------------------------|-------------------------|----------------------------------------|------|
| 6             | HAY          | AC                          | PBMCs       | 67          | 360                                | 810            | 42%                              | 25194                                  | 1126                    | 2331                                   | 0.51 |
| 6             | HT/UV1       | UV                          | PBMCs       | 81          | 150                                | 751            | 44%                              | 30736                                  | 541                     | 1140                                   | 0.44 |
| 6             | TAA          | HAM/TSP                     | PBMCs       | 70          | 220                                | 620            | 33%                              | 30009                                  | 924                     | 2163                                   | 0.46 |
| 6             | TAL          | HAM/TSP                     | PBMCs       | 71          | 870                                | 670            | 50%                              | 33302                                  | 1757                    | 3145                                   | 0.43 |
| 6             | TAW          | HAM/TSP                     | PBMCs       | 81          | 140                                | 350            | 27%                              | 28024                                  | 551                     | 1114                                   | 0.41 |
| 6             | TAY          | HAM/TSP                     | PBMCs       | 65          | 140                                | not available  | not available                    | 23194                                  | 640                     | 1050                                   | 0.38 |
| 6             | TBC          | HAM/TSP                     | PBMCs       | 67          | 2000                               | 1220           | not available                    | 21252                                  | 3364                    | 7588                                   | 0.41 |
| 6             | TBG          | HAM/TSP                     | PBMCs       | 73          | 1460                               | 1220           | 54%                              | 26671                                  | 2132                    | 3713                                   | 0.48 |
| 6             | TBK          | HAM/TSP                     | PBMCs       | 82          | 2080                               | 1490           | 39%                              | 92391                                  | 1243                    | 3558                                   | 0.77 |
| 6             | TBW          | HAM/TSP                     | PBMCs       | 65          | 730                                | 260            | 18%                              | 42584                                  | 1664                    | 3386                                   | 0.54 |
| 6             | TW           | HAM/TSP                     | PBMCs       | 43          | 890                                | 1350           | 59%                              | 36642                                  | 2206                    | 3985                                   | 0.51 |
| 7             | TAL          | HAM/TSP                     | PBMCs       | 72          | 750                                | 1046           | 51%                              | 26058                                  | 1648                    | 2955                                   | 0.43 |
| 7             | TAN          | HAM/TSP                     | PBMCs       | 52          | 400                                | 760            | 54%                              | 21024                                  | 1388                    | 3427                                   | 0.27 |
| 7             | TAS          | HAM/TSP                     | PBMCs       | 61          | 300                                | 1030           | 44%                              | 13485                                  | 901                     | 2147                                   | 0.32 |
| 7             | TAT          | HAM/TSP                     | PBMCs       | 74          | 960                                | 1934           | 53%                              | 10525                                  | 1282                    | 2907                                   | 0.33 |
| 7             | TBA          | HAM/TSP                     | PBMCs       | 68          | 960                                | 1270           | 59%                              | 27784                                  | 1215                    | 2887                                   | 0.47 |
| 7             | TCO          | HAM/TSP                     | PBMCs       | 54          | 180                                | 1040           | 43%                              | 17903                                  | 497                     | 1346                                   | 0.31 |
| 7             | TBJ          | HAM/TSP                     | PBMCs       | 49          | 1580                               | 1868           | 49%                              | 16907                                  | 1442                    | 4222                                   | 0.43 |
| 7             | TCG          | HAM/TSP                     | PBMCs       | 49          | 360                                | 680            | 55%                              | 28031                                  | 766                     | 1471                                   | 0.43 |
| 7             | TDA          | HAM/TSP                     | PBMCs       | 42          | 620                                | 1050           | 49%                              | 7125                                   | 805                     | 2370                                   | 0.27 |
| 7             | TAZ          | HAM/TSP                     | PBMCs       | 69          | 1250                               | 1410           | 52%                              | 13636                                  | 1965                    | 4606                                   | 0.38 |
| 7             | TBO          | HAM/TSP                     | PBMCs       | 63          | 700                                | 770            | 45%                              | 13519                                  | 1066                    | 2236                                   | 0.34 |
| 7             | TBR          | HAM/TSP                     | PBMCs       | 57          | 470                                | 1540           | 63%                              | 47148                                  | 1461                    | 3028                                   | 0.39 |
| 7             | TCR          | HAM/TSP                     | PBMCs       | 48          | 590                                | 1050           | 47%                              | 38437                                  | 2048                    | 4245                                   | 0.34 |
| 8             | HDM-LFK      | ATLL chronic                | PBMCs       | 64          | 1570                               | 4530           | 78%                              | 27128                                  | 255                     | 501                                    | 0.90 |
| 8             | HBE          | AC                          | PBMCs       | 75          | 360                                | 650            | 34%                              | 7860                                   | 888                     | 2872                                   | 0.32 |
| 8             | HBV          | AC                          | PBMCs       | 52          | 160                                | 1600           | 42%                              | 10377                                  | 422                     | 1637                                   | 0.19 |
| 8             | HBT          | AC                          | PBMCs       | 68          | 50                                 | 1050           | 41%                              | 12183                                  | 126                     | 191                                    | 0.42 |
| 8             | KD5          | ATLL chronic                | PBMCs       | 56          | 1210                               | not available  | not available                    | 4659                                   | 17                      | 47                                     | 0.82 |
| 8             | TBX-LFI      | ATLL lymphoma               | PBMCs       | 35          | 270                                | 850            | 36%                              | 23472                                  | 353                     | 770                                    | 0.61 |
| 8             | HDA          | AC                          | PBMCs       | 44          | 30                                 | 770            | 52%                              | 10290                                  | 89                      | 211                                    | 0.28 |
| 8             | HFE          | AC                          | PBMCs       | 68          | 650                                | 871            | 30%                              | 12767                                  | 702                     | 1865                                   | 0.42 |
| 8             | HDS          | AC                          | PBMCs       | 59          | 250                                | 1750           | not available                    | 18010                                  | 952                     | 1993                                   | 0.36 |
| 8             | HEZ          | AC                          | PBMCs       | 51          | 340                                | 490            | 40%                              | 44252                                  | 1935                    | 4020                                   | 0.38 |
| 8             | TCT          | HAM/TSP                     | PBMCs       | 56          | 550                                | 1410           | 68%                              | 26719                                  | 1943                    | 4638                                   | 0.35 |
| 9             | HDM-LFK      | ATLL chronic                | PBMCs       | 68          | 640                                | 830            | 64%                              | 25356                                  | 367                     | 603                                    | 0.75 |
| 9             | LFA          | ATLL cutaneous              | PBMCs       | 57          | 1060                               | 1040           | 56%                              | 30600                                  | 1025                    | 1708                                   | 0.63 |
| 9             | LFC          | ATLL chronic                | PBMCs       | 44          | 1230                               | 4530           | 75%                              | 29217                                  | 2426                    | 5463                                   | 0.49 |
| 9             | P7           | ATLL chronic / polymyositis | PBMCs       | 72          | 1830                               | 2430           | 80%                              | 39283                                  | 3182                    | 4885                                   | 0.57 |
| 9             | KD5          | ATLL chronic                | PBMCs       | 58          | 1320                               | not available  | not available                    | 19801                                  | 27                      | 73                                     | 0.92 |
| 9             | TBX-LFI      | ATLL lymphoma               | PBMCs       | 36          | 210                                | 390            | 36%                              | 32102                                  | 238                     | 717                                    | 0.83 |
| 9             | HCG-LEY      | ATLL chronic                | PBMCs       | 37          | 1830                               | 2060           | 87%                              | 96662                                  | 269                     | 1251                                   | 0.83 |
| 9             | LEZ          | ATLL acute                  | PBMCs       | 37          | 2670                               | 1790           | 79%                              | 86061                                  | 243                     | 581                                    | 0.90 |
| 9             | LFE          | ATLL lymphoma               | PBMCs       | 65          | 740                                | 1430           | 56%                              | 28028                                  | 1258                    | 2018                                   | 0.49 |
| 9             | TBS          | HAM/TSP                     | PBMCs       | 69          | 1040                               | not available  | not available                    | 21127                                  | 2396                    | 5379                                   | 0.45 |
| 9             | LFP          | AC                          | PBMCs       | 51          | 60                                 | 1280           | 53%                              | 59035                                  | 242                     | 658                                    | 0.25 |
| 10            | A1 (~KD5)    | ATLL acute                  | PBMCs       | 59          | 2120                               | not available  | not available                    | 39703                                  | 10                      | 46                                     | 1.00 |
| 10            | C1 (~KD5)    | ATLL chronic                | PBMCs       | 56          | 1650                               | not available  | not available                    | 22709                                  | 9                       | 14                                     | 1.00 |
| 10            | LN C2        | ATLL chronic                | Lymph node  | unknown     | 1280                               | not applicable | not applicable                   | 27356                                  | 105                     | 310                                    | 0.93 |
| 10            | C3           | ATLL chronic                | PBMCs       | unknown     | 6400                               | not available  | not available                    | 15560                                  | 5                       | 8                                      | 1.00 |

| Flow cell no. | Patient code | Disease status   | Sample type | Age (years) | PVL (copy number per 10,000 PBMCs) | CD4 count      | percentage of CD4 in lymphocytes | Number of reads (human sequences only) | Number of UISS observed | Estimated total number of UISS in host | OCI  |
|---------------|--------------|------------------|-------------|-------------|------------------------------------|----------------|----------------------------------|----------------------------------------|-------------------------|----------------------------------------|------|
| 10            | C4           | ATLL chronic     | PBMCs       | unknown     | 2040                               | not available  | not available                    | 64408                                  | 30                      | 114                                    | 1.00 |
| 10            | S1           | ATLL smouldering | PBMCs       | 59          | 1810                               | not available  | not available                    | 27415                                  | 830                     | 2497                                   | 0.90 |
| 10            | S2           | ATLL smouldering | PBMCs       | 69          | 1080                               | not available  | not available                    | 7531                                   | 234                     | 627                                    | 0.79 |
| 10            | SKN S3       | ATLL cutaneous   | Skin        | 82          | 340                                | not applicable | not applicable                   | 19760                                  | 276                     | 749                                    | 0.76 |
| 10            | S4           | ATLL smouldering | PBMCs       | unknown     | 1670                               | not available  | not available                    | 14621                                  | 629                     | 2390                                   | 0.67 |
| 10            | S5           | ATLL smouldering | PBMCs       | 65          | 360                                | not available  | not available                    | 24410                                  | 53                      | 176                                    | 0.99 |
| 11            | LEU          | ATLL lymphoma    | PBMCs       | 64          | 4550                               | 490            | 49%                              | 19440                                  | 7                       | 13                                     | 0.97 |
| 11            | LEP          | ATLL acute       | PBMCs       | 73          | 2120                               | not available  | not available                    | 78233                                  | 276                     | 864                                    | 0.97 |
| 11            | AN           | ATLL acute       | PBMCs       | 47          | 2430                               | not available  | not available                    | 28545                                  | 45                      | 119                                    | 0.97 |
| 11            | JH           | ATLL acute       | PBMCs       | 44          | 3120                               | not available  | not available                    | 76432                                  | 107                     | 409                                    | 0.99 |
| 11            | LN TBX-LFI   | ATLL lymphoma    | Lymph node  | 36          | 7410                               | not applicable | not applicable                   | 52959                                  | 5                       | 6                                      | 0.85 |
| 12            | S6 (~SKN S3) | ATLL cutaneous   | PBMCs       | 82          | 1500                               | not available  | not available                    | 24823                                  | 282                     | 649                                    | 0.94 |
| 13            | HES          | AC               | PBMCs       | 68          | 1770                               | 890            | 48%                              | 31271                                  | 1981                    | 4119                                   | 0.36 |
| 13            | HDR          | AC               | PBMCs       | 48          | 270                                | 1090           | 57%                              | 44265                                  | 471                     | 725                                    | 0.48 |
| 13            | HCS          | AC               | PBMCs       | 38          | 540                                | 1145           | 53%                              | 35281                                  | 76                      | 88                                     | 0.48 |

**Table S1. Summary of data by individual sample**

The patients HAY, HT, TAN, TAY, TAZ, TBA, TBG, TBK, TBO, TBR and TBW were also studied (using conventional linker-mediated PCR) in Meekings KN, Leipzig J, Bushman FD, Taylor GP, Bangham CR. HTLV-1 integration into transcriptionally active genomic regions is associated with proviral expression and with HAM/TSP. PLoS.Pathog.2008;4:e1000027.



### Mapping of UISs and quantification of UIS abundance

Ten micrograms of DNA from uncultured PBMCs in a volume of 100µl of Elution Buffer (EB, Qiagen) were sheared by sonication with a Covaris S2 instrument (Covaris). The operating conditions were the following: water bath at 6 to 8°C, 5 seconds at 20% duty cycle, intensity level 5 and 200 cycles per burst and 90 seconds at 5% duty cycle, intensity level 3 and 200 cycles per burst. DNA ends were then end-repaired using 15 units of T4 DNA polymerase (New England Biolabs), 5 units of DNA polymerase I Klenow fragment (NEB), 50 units of T4 polynucleotide kinase (NEB) and 0.8 mM of dNTP (Sigma) in T4 DNA ligase buffer (NEB) at 20°C during 30 min. DNA was then cleaned using a Qiaquick PCR purification kit (Qiagen) and eluted in 64µl of EB. Addition of an adenosine at the 3' ends of the DNA was performed by adding 0.2mM of dATP (Sigma) and 15 units of Klenow Fragment 3' to 5' exo- (NEB) in NEB2 buffer (NEB) at 37°C for 30 min. DNA was then cleaned using a Qiaquick PCR purification kit and eluted in 40µl of EB. One hundred pmol of a partially double stranded DNA linker was ligated to the DNA ends using a Quick ligation kit (NEB). Twenty six different linkers were constructed, each one with a specific 6bp tag (see primer list below) to allow multiplexing of DNA samples during the sequencing. DNA was cleaned using a Qiaquick PCR purification kit and eluted in 60µl of EB. The 60µl of ligated product was then split into 3 aliquots of 20µl and each aliquot was used in a separate PCR1 reaction. For each PCR reaction, 20µl of ligated product was mixed with 0.2mM of dNTP (Sigma), 50pmol of B3 primer (binds HTLV-1 LTR), 10pmol of B4 primer (which anneals to the strand of the linker generated by the amplification from Bio3), 1 unit of Phusion DNA polymerase (Finnzyme, NEB) in High Fidelity buffer (Finnzyme, NEB). The following thermal protocol was used: 96°C 30sec; (94°C 5sec, 72°C 1min) 7 cycles; (94°C 5 sec, 68°C 1 min) 23 cycles; 68°C 9 min; hold 4°C until user stops. The 3 PCR1 products, derived from the same sample were then pooled, the DNA cleaned using a Qiaquick PCR purification kit and eluted in 150µl of EB. To perform PCR2, 1ul of the cleaned PCR1 product was mixed with 0.2mM of dNTP (Sigma), 25pmol of P5B5 primer (binds HTLV-1 LTR), 25pmol of P7 primer (binds the linker), 1 unit of Phusion DNA polymerase in High Fidelity buffer. The following thermal protocol was used: 96°C 30sec; (94°C 5sec, 72°C 1min) 7 cycles; (94°C 5 sec, 68°C 1 min) 23 cycles; 68°C 9 min; hold 4°C until user stops. See primer list above for the sequences of B3, B4, P5B5 and P7 primers. DNA was then cleaned using a Qiaquick PCR purification kit and eluted in 50µl of EB. A library was constructed by pooling the different PCR2 products (each one possessing a specific tag). Quantification of the libraries was made by QPCR using primers P5 and P7 (see primer list) and a Light cycler-fast start DNA master<sup>plus</sup> SYBR green 1 kit following manufacturer's protocol (Roche). Three dilutions of the library (200pg, 66pg and 22pg) were amplified. Standard curves were generated using a library quantified on a titration flow cell previously run on a

Genome Analyzer II (Illumina). Stock libraries were diluted down to 0.5 pM and clustered on the flow cell. Paired-end reads (read1 and read2 each 50bp) plus a 6 bp tag read (read 3) were acquired on a GA II. The library construction pipeline was split into four steps: 1. DNA isolation and shearing; 2. Pre-PCR manipulations (ends repair and ligation); 3. PCR1 and PCR2 and library QPCR; 4. Library sequencing. Each step was carried out in a specific room and the sample flow was unidirectional, to minimize the risk of PCR contamination.

The following definitions were used. An “amplicon” is a molecule generated during PCR; “duplicates” are amplicons of a given insertion site having the same length (i.e. having the same shear site). “Sister cells” are cells where the HTLV-1 provirus is inserted at the same site in the cellular genome and a “clone” is a population of sister cells. Figure 1A illustrates the amplicon structure. Read 1 and read 2 were mapped against the HTLV-1 and the human genome (hg18 assembly) using CASAVA software 1.5. First, we excluded overlapping clusters, and then applied the following quality control filters: i) the single-read alignment scores of read 1 and read 2 must be higher than 10 (value attributed by CASAVA); ii) the strand orientation of the 2 reads must be opposite; iii) the length of the amplicons must be smaller than 1kb. Because the PCR is not specific to the 3’LTR, we discarded the amplicons generated from the 5’LTR that contained only HTLV-1 sequences. We identified read 1 sequences that started with ACACA (the five bases at the 3’ terminus of the HTLV-1 LTR). Read 1 and read 2 sequences were used to map the insertion site and the shear site. Read 3 was used to allocate the insertion site to a particular sample. Together with the mapping of a large number of UISs, the goal of our approach is to quantify the abundance of each UIS as illustrated in Figure 1B. Because PCR preferentially amplifies short products, the number of amplicons cannot be used to quantify the abundance of a given UIS. Random DNA fragmentation by sonication is a key feature to allow the quantification of the UIS abundance because, unlike restriction enzymes, it is not biased to particular nucleotide sequences. For each UIS, we count the number of amplicons of different length. Additionally, misreading of the tag index during the sequencing could lead to the attribution of a particular insertion site to different samples. We solved this issue by taking into account not only the 6bp tag information but also the total number of distinct shear sites and the total number of reads for a given insertion site to attribute the insertion site to the correct sample. Finally, control DNA (from a human T-cell line (Jurkat) uninfected by HTLV-1) was run on every lane of each flow cell to assess the effectiveness of our quality control procedures. An example of the analysis pipeline from a representative experiment is given in Figure S1A. The number of distinct shear sites for a given insertion site was then corrected using a calibration curve (see Figure S1B)

because the probability of DNA shearing at the same place in two distinct cells increases with the number of sister cells of that infected T-cell clone. To generate the calibration curve, 3 dilutions (10µg, 1µg and 0.1µg) of a unique infected genomic DNA were analyzed in duplicate. The calibration curve is a spline fit of the data and the coefficients in it were estimated using the `lm` function of the R language for statistical computing <sup>1</sup>:

$$s_{corr} = \text{EXP}(\text{LN}(\text{MIN}(50, s)) + 1.18 * \text{MAX}(0, \text{LN}(s) - \text{LN}(50)) + 0.707 * \text{MAX}(0, \text{LN}(s) - \text{LN}(50))^2)$$

where  $s$  is the number of distinct shear sites observed

$s_{corr}$  is the number of distinct shear sites expected, also referred as the corrected number of distinct shear sites

The absolute abundance of a given UIS (number of a particular insertion site per 10,000 PBMCs) was calculated as follows:

$$\text{absolute abundance of a given UIS } i = \frac{G_{corr,i}}{\sum_{j=1}^S G_{corr,j}} PVL$$

where  $S$  is the total number of UISs identified in that sample and  $PVL$  is the proviral load (sum of the absolute abundances of all insertion sites in that sample).

The absolute abundance of a given UIS (in number of copies per 10,000 PBMCs) is equal to the absolute abundance of the T-cell clone carrying that provirus (in number of cells per 10,000 PBMCs) only when that clone carry one provirus per cell. It has been shown that the leukemic clones carry generally one provirus per cell <sup>2-4</sup> but large-scale systematic studies will be necessary to generalize this observation to the majority of infected clones.

Oligoclonality index and estimation of the total number of UISs in the entire body of the host

We wished to use a measure of the clonality of the UIS population, i.e. a measure of the non-uniformity of the frequency distribution of UIS abundance. We used two measures: the oligoclonality index and the Shannon evenness index.

*Oligoclonality index (see Figure S2A for illustration)*

The oligoclonality index (OCI) is based on the Gini coefficient <sup>5</sup> and is calculated as

$$OCI = 2 * \left\{ \sum_{k=1}^S \frac{X_k}{S} - 0.5 \right\}$$

Where

$G_{corr,i}$  the corrected number of distinct shear sites for a given UIS  $i$

$S$  the total number of UISs identified in the sample

$$N = \sum_{i=1}^S G_{corr,i}$$

the sum of the corrected number of distinct shear sites for all the UISs

$$p_i = \frac{G_{corr,i}}{N}$$

the relative abundance of each UIS

$$X_k = \sum_{i=1}^{k-1} p_i$$

the cumulative relative abundance of UIS ranked in decreasing order of abundance

*Shannon evenness index*

We calculate the Shannon evenness index as

$$E_{SH} = - \frac{\sum_{i=1}^S (p_i - \ln(p_i)) - \left( \frac{S-1}{2N} \right)}{\ln S}$$

We routinely use the OCI because oligoclonality is a critical biological feature of the persistence and replication of HTLV-1.

*Estimation of total number of UISs in the entire body of the host (Chao1-bc)*

The Chao1-bc estimator<sup>6</sup> is calculated as follows:

$$\text{Chao1bc} = S + \frac{f_1(f_1 - 1)}{2(f_2 + 1)}$$

Where

- $S$  the total number of UISs identified in the sample
- $f_1$  the number of UISs that are represented exactly once in the sample (i.e. UISs with a corrected number of distinct shear sites = 1)
- $f_2$  the number of UISs that are represented exactly twice in the sample (i.e. UISs with a corrected number of distinct shear sites = 2)

#### Genetic and epigenetic environment around the proviral insertion site

We used the Integration Site Pipeline and Database (INSIPID) from the Pr Bushman laboratory (Department of Microbiology, University of Pennsylvania School of Medicine, Pennsylvania, Philadelphia, United States of America) (<http://microb215.med.upenn.edu/insipid/>). The purpose of this web-based tool is to house sequences of newly inserted elements in vertebrate genomes and allow users to investigate their locations. In our experiment, we produced a set of Unique Insertion Sites of the HTLV provirus from several infected patients. INSIPID houses the UISs together with associated annotation, then allow us to call up the UIS and information about them.

The following table gives a concrete example of the INSIPID output and how we calculate the values shown in Fig. 4:

| Patient code | Disease Status | Chromosome | Position  | Strand | UIS abundance (in copies per 10,000 PBMCs) | inGene (Refseq) | inGene Orientation | nearest Gene Distance (bp) | nearest CpG Island Distance (bp) | H2BK120 ac Count 10k | H2BK20 ac Count 10k | H2BK5 ac Count 10k | H3K18 ac Count 10k | H3K27 ac Count 10k | H3K4 ac Count 10k | H3K9 me2 Count 10k | H3K9 me3 Count 10k | Figure 4, panel B   |                   | Figure 4, panel D |                    |
|--------------|----------------|------------|-----------|--------|--------------------------------------------|-----------------|--------------------|----------------------------|----------------------------------|----------------------|---------------------|--------------------|--------------------|--------------------|-------------------|--------------------|--------------------|---------------------|-------------------|-------------------|--------------------|
|              |                |            |           |        |                                            |                 |                    |                            |                                  |                      |                     |                    |                    |                    |                   |                    |                    | H4K20 me3 Count 10k | H4K5 ac Count 10k | H4K8 ac Count 10k | H4K91 ac Count 10k |
| C3           | ATLL           | chr5       | 94400662  | +      | 6370                                       | MCTP1           | -                  | 42639                      | 244553                           | 1                    | 4                   | 3                  | 2                  | 1                  | 0                 | 33                 | 38                 | 10                  | 4                 | 7                 | 2                  |
| LEU          | ATLL           | chr1       | 20877564  | +      | 4212                                       | KIF17           | -                  | -14471                     | -16739                           | 7                    | 4                   | 6                  | 16                 | 8                  | 6                 | 12                 | 15                 | 12                  | 18                | 24                | 5                  |
| JH           | ATLL           | chr2       | 138170969 | +      | 3071                                       | FALSE           | NA                 | -19212                     | 804534                           | 3                    | 5                   | 6                  | 2                  | 1                  | 2                 | 55                 | 24                 | 17                  | 4                 | 4                 | 2                  |
| LEP          | ATLL           | chr3       | 197773499 | -      | 2025                                       | WDR53           | -                  | -6311                      | -6236                            | 35                   | 52                  | 41                 | 28                 | 43                 | 30                | 21                 | 3                  | 4                   | 49                | 29                | 37                 |
| C4           | ATLL           | chr7       | 90098693  | -      | 2005                                       | FALSE           | NA                 | -77954                     | 34393                            | 6                    | 1                   | 5                  | 1                  | 4                  | 1                 | 28                 | 15                 | 7                   | 1                 | 5                 | 2                  |
| AN           | ATLL           | chr9       | 112538958 | +      | 1950                                       | MUSK            | +                  | 64141                      | -157108                          | 1                    | 3                   | 3                  | 6                  | 4                  | 2                 | 58                 | 32                 | 24                  | 4                 | 2                 | 1                  |
| LEZ          | ATLL           | chr12      | 129441003 | +      | 1826                                       | FALSE           | NA                 | 5630                       | 33727                            | 3                    | 3                   | 8                  | 2                  | 8                  | 4                 | 58                 | 15                 | 65                  | 6                 | 11                | 3                  |
| KD5          | ATLL           | chr9       | 15797049  | +      | 1485                                       | C9orf93         | +                  | 164848                     | -253715                          | 2                    | 1                   | 2                  | 6                  | 2                  | 2                 | 44                 | 28                 | 8                   | 1                 | 3                 | 0                  |
| HCG-LEY      | ATLL           | chrX       | 147227167 | -      | 1472                                       | FALSE           | NA                 | -162663                    | -162386                          | 68                   | 56                  | 56                 | 77                 | 65                 | 61                | 27                 | 11                 | 29                  | 29                | 40                | 60                 |
| S1           | ATLL           | chr13      | 35811059  | -      | 1263                                       | SPG20           | -                  | -7587                      | -6678                            | 14                   | 18                  | 6                  | 9                  | 7                  | 11                | 42                 | 9                  | 8                   | 13                | 22                | 7                  |
| S6           | ATLL           | chr8       | 142483050 | -      | 1170                                       | FALSE           | NA                 | -18138                     | 11374                            | 194                  | 181                 | 194                | 219                | 184                | 182               | 12                 | 4                  | 13                  | 141               | 98                | 267                |
| S4           | ATLL           | chr1       | 182126012 | +      | 924                                        | RGL1            | +                  | 38277                      | -84973                           | 60                   | 60                  | 28                 | 84                 | 55                 | 52                | 36                 | 7                  | 11                  | 67                | 51                | 37                 |
| S2           | ATLL           | chr10      | 51234264  | +      | 359                                        | FALSE           | NA                 | 849                        | 813                              | 66                   | 61                  | 82                 | 83                 | 91                 | 52                | 25                 | 9                  | 12                  | 54                | 71                | 79                 |
| S5           | ATLL           | chr16      | 64689163  | +      | 354                                        | FALSE           | NA                 | 268862                     | 172623                           | 2                    | 3                   | 6                  | 5                  | 3                  | 13                | 50                 | 14                 | 10                  | 5                 | 7                 | 2                  |
| TBX-LFI      | ATLL           | chr1       | 151510970 | +      | 85                                         | FALSE           | NA                 | -9746                      | 264078                           | 4                    | 7                   | 3                  | 6                  | 2                  | 5                 | 30                 | 20                 | 10                  | 7                 | 5                 | 5                  |
| LFC          | ATLL           | chr13      | 45858440  | -      | 85                                         | C13orf18        | -                  | -1196                      | -245                             | 13                   | 26                  | 16                 | 36                 | 19                 | 19                | 28                 | 12                 | 11                  | 31                | 36                | 28                 |
| LFA          | ATLL           | chr15      | 36147866  | -      | 66                                         | FALSE           | NA                 | 116951                     | -4421                            | 20                   | 18                  | 7                  | 21                 | 6                  | 19                | 55                 | 35                 | 15                  | 26                | 24                | 12                 |
| P7           | ATLL           | chr11      | 31332995  | -      | 38                                         | DCDC1           | -                  | -14902                     | -14668                           | 8                    | 9                   | 3                  | 8                  | 3                  | 4                 | 13                 | 15                 | 4                   | 9                 | 8                 | 1                  |
| LFE          | ATLL           | chr5       | 60952642  | -      | 19                                         | FALSE           | NA                 | -16750                     | -4649                            | 8                    | 12                  | 5                  | 7                  | 1                  | 11                | 37                 | 12                 | 18                  | 12                | 12                | 5                  |

6 UISs out of 19 lie within +/- 10kb of a gene: Pr=32%  
Pr random=19%

6 UISs out of 19 lie within +/- 10kb of a CpG island: Pr=32%  
Pr random=15%

The mean count N=15  
N random=16

The mean count N=24  
N random=15

The first 6 columns are used as input for INSIPID and give for each UIS (each row), the patient code (from whom the blood sample is coming), the disease status, the position and orientation of the provirus (Chromosome, Position and Strand columns), and the UIS abundance.

The other columns are the output from INSIPID:

“In Gene” column gives the name of the Gene when the provirus is inserted in it or FALSE if not. We meant here RefSeq gene.

“inGene Orientation “ column gives the orientation (+ or – strand) of the gene when applicable

“nearest Gene Distance (bp)” column gives the distance in bp of the nearest gene (3’ or 5’ end)

“nearest CpG Island Distance (bp)” column gives the distance of the nearest CpG island

The columns “histoneX Count 10k” give the number of that particular histone mark in a 10kb window around the UIS. These data come from 2 resource papers:

Barski A, Cuddapah S, Cui K et al. High-resolution profiling of histone methylations in the human genome. *Cell* 2007;129:823-837.

Wang Z, Zang C, Rosenfeld JA et al. Combinatorial patterns of histone acetylations and methylations in the human genome. *Nat.Genet.* 2008;40:897-903.

## Primer list

B3: 5' CCTTTCATTACGACTGACTGCCG

B4: 5' TCATGATCAATGGGACGATCA

P5B5: 5' AATGATACGGCGACCACCGAGATCTACTGGCTCGGAGCCAGCGACAGCCCAT

P5: 5' AATGATACGGCGACCACCGAGAT

P7: 5' CAAGCAGAAGACGGCATAACGA

"upper arm" linker: 5'p-GATCGGAAGAGCGAAAAAAAAAAAAA

"lower arms" linker with different tag

LA1

5' TCATGATCAATGGGACGATCACAAGCAGAAGACGGCATAACGAGATCGTGATCGGTCTCGGCATTCTGCT  
GAACCGCTCTTCCGATCT

LA2

5' TCATGATCAATGGGACGATCACAAGCAGAAGACGGCATAACGAGATGTCTTCGGTCTCGGCATTCTGCT  
GAACCGCTCTTCCGATCT

LA3

5' TCATGATCAATGGGACGATCACAAGCAGAAGACGGCATAACGAGATAGTGCCGGTCTCGGCATTCTGCT  
GAACCGCTCTTCCGATCT

LA4

5' TCATGATCAATGGGACGATCACAAGCAGAAGACGGCATAACGAGATTTAGAGCCCGGTCTCGGCATTCTGCT  
GAACCGCTCTTCCGATCT

LA5

5' TCATGATCAATGGGACGATCACAAGCAGAAGACGGCATAACGAGATTCTTAGCGGTCTCGGCATTCTGCT  
GAACCGCTCTTCCGATCT

LA6

5' TCATGATCAATGGGACGATCACAAGCAGAAGACGGCATAACGAGATACGGATCGGTCTCGGCATTCTGCT  
GAACCGCTCTTCCGATCT

LA7

5' TCATGATCAATGGGACGATCACAAGCAGAAGACGGCATAACGAGATCGTACCCCGGTCTCGGCATTCTGCT  
GAACCGCTCTTCCGATCT

LA8

5' TCATGATCAATGGGACGATCACAAGCAGAAGACGGCATAACGAGATGGAATTCGGTCTCGGCATTCTGCT  
GAACCGCTCTTCCGATCT

LA9

5' TCATGATCAATGGGACGATCACAAGCAGAAGACGGCATAACGAGATTATACGCGGTCTCGGCATTCTGCT  
GAACCGCTCTTCCGATCT



LA10

5' TCATGATCAATGGGACGATCACAAGCAGAAGACGGCATAACGAGATGGGATTCGGTCTCGGCATTCTGCT  
GAACCGCTCTTCCGATCT

LA11

5' TCATGATCAATGGGACGATCACAAGCAGAAGACGGCATAACGAGATCACACACGGTCTCGGCATTCTGCT  
GAACCGCTCTTCCGATCT

LA12

5' TCATGATCAATGGGACGATCACAAGCAGAAGACGGCATAACGAGATTGTGTGCGGTCTCGGCATTCTGCT  
GAACCGCTCTTCCGATCT

LA13

5' TCATGATCAATGGGACGATCACAAGCAGAAGACGGCATAACGAGATGTAGTACGGTCTCGGCATTCTGCT  
GAACCGCTCTTCCGATCT

LA14

5' TCATGATCAATGGGACGATCACAAGCAGAAGACGGCATAACGAGATAGGTCTCGGTCTCGGCATTCTGCT  
GAACCGCTCTTCCGATCT

LA15

5' TCATGATCAATGGGACGATCACAAGCAGAAGACGGCATAACGAGATACAGGCCGGTCTCGGCATTCTGCT  
GAACCGCTCTTCCGATCT

LA16

5' TCATGATCAATGGGACGATCACAAGCAGAAGACGGCATAACGAGATCTAGTCCGGTCTCGGCATTCTGCT  
GAACCGCTCTTCCGATCT

LA17

5' TCATGATCAATGGGACGATCACAAGCAGAAGACGGCATAACGAGATCAGATCCGGTCTCGGCATTCTGCT  
GAACCGCTCTTCCGATCT

LA18

5' TCATGATCAATGGGACGATCACAAGCAGAAGACGGCATAACGAGATCTGCTACGGTCTCGGCATTCTGCT  
GAACCGCTCTTCCGATCT

LA19

5' TCATGATCAATGGGACGATCACAAGCAGAAGACGGCATAACGAGATGTTTCAGCGGTCTCGGCATTCTGCT  
GAACCGCTCTTCCGATCT

LA20

5' TCATGATCAATGGGACGATCACAAGCAGAAGACGGCATAACGAGATGAGTTCCGGTCTCGGCATTCTGCT  
GAACCGCTCTTCCGATCT

LA21

5' TCATGATCAATGGGACGATCACAAGCAGAAGACGGCATAACGAGATGCATAGCGGTCTCGGCATTCTGCT  
GAACCGCTCTTCCGATCT

LA22

5' TCATGATCAATGGGACGATCACAAGCAGAAGACGGCATAACGAGATTCAGACCGGTCTCGGCATTCTGCT  
GAACCGCTCTTCCGATCT

LA23

5' TCATGATCAATGGGACGATCACAAGCAGAAGACGGCATAACGAGATTCTTGGCGGTCTCGGCATTCCCTGCT  
GAACCGCTCTTCCGATCT

LA24

5' TCATGATCAATGGGACGATCACAAGCAGAAGACGGCATAACGAGATTGGTCCCAGGTCTCGGCATTCCCTGCT  
GAACCGCTCTTCCGATCT

LA25

5' TCATGATCAATGGGACGATCACAAGCAGAAGACGGCATAACGAGATATGATGCGGTCTCGGCATTCCCTGCT  
GAACCGCTCTTCCGATCT

LA26

5' TCATGATCAATGGGACGATCACAAGCAGAAGACGGCATAACGAGATTCGTGCCAGGTCTCGGCATTCCCTGCT  
GAACCGCTCTTCCGATCT

## REFERENCES

1. R Development Core Team. *R: A language and environment for statistical computing*. Vienna: R Foundation for Statistical Computing; 2010.
2. Tamiya S, Matsuoka M, Etoh K et al. Two types of defective human T-lymphotropic virus type I provirus in adult T-cell leukemia. *Blood* 1996;88:3065–3073.
3. Ohshima K, Ohgami A, Matsuoka M et al. Random integration of HTLV-1 provirus: increasing chromosomal instability. *Cancer Lett.* 1998;132:203–212.
4. Kamihira S, Sugahara K, Tsuruda K et al. Proviral status of HTLV-1 integrated into the host genomic DNA of adult T-cell leukemia cells. *Clin.Lab Haematol.* 2005;27:235–241.
5. Gini C. Sulla misura della concentrazione e della variabilita dei caratteri. *Transactions of the Real Istituto Veneto di Scienze* 1914;LIII:1203.
6. Chao A. Species estimation and application. In: Balakrishman N, Read CB, Vidakovic B, eds. *Encyclopedia of Statistical Sciences*. Vol 12. New York: Wiley; 2005:7907–7916.
